# Supplementary material
Source: Springer Nature journal article supplement (https://www.springermedizin.de/resource/supplementary/12985_2013_2258_MOESM6_ESM.pdf/9606386)

**A**

|                    |     |                                                                       |              |     |
|--------------------|-----|-----------------------------------------------------------------------|--------------|-----|
| gi 300244872 ChikV | 122 | KVTGYACLVGDKVMKPAHVKGTIDNADLAKLAFKRS                                  | SKYDLECAQIPV | 169 |
| gi 130568 ONNVG    | 121 | KVTGYACLVGDKVMKPAHVKGTIDNADLAKLAFKRS                                  | SKYDLECAQIPV | 168 |
| gi 81993243 SFV    | 128 | KVTGYACLVGDKVMKPAHVKGTIDNADLAKLAFKRS                                  | SKYDLECAQIPV | 175 |
| gi 82058208 MIDDV  | 132 | KVTGYACLVGDKVMKPAHVKGTIDNPDLAKLAFKRS                                  | SKYDLECAQIPV | 179 |
| gi 109940316 BFV   | 114 | KVNGYACLVGDKVMKPAHVKGTIDNPELAKLTFKRS                                  | SKYDLECAQVPV | 161 |
| gi 82064540 SINDV  | 124 | DVIGHALAMEGKVMKPLHVKGTIDHPVLSKIKETKS                                  | SAYDMEFAQLPV | 171 |
|                    |     | * * : * : . ***** * * * . * * : . * : * * * . : * * * * * : * * : * * |              |     |

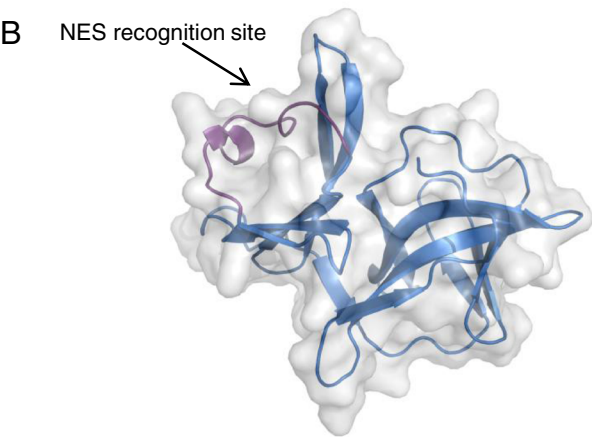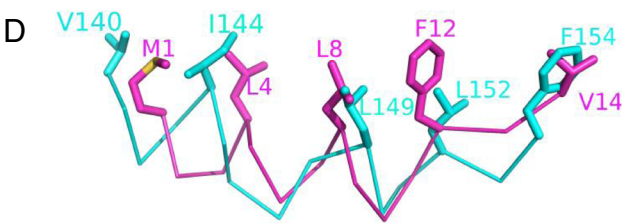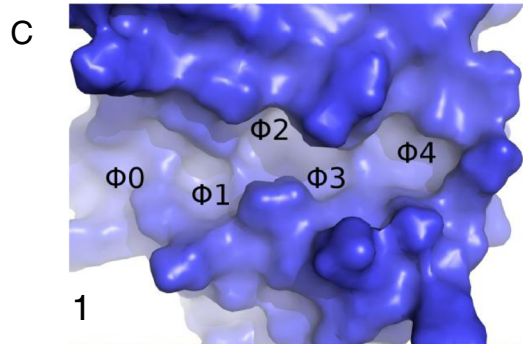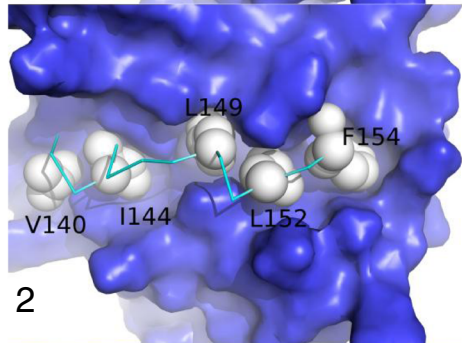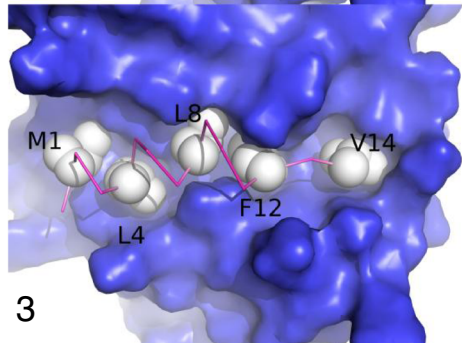

Supplement: MOESM6 [file 9606386]
